# Supplementary material
Source: PubMed Central journal article supplement (PMC4209986)
Supplement: pnas.201412685SI.pdf [file pnas.201412685SI.pdf]

# Supporting Information

Wang et al. 10.1073/pnas.1412685111

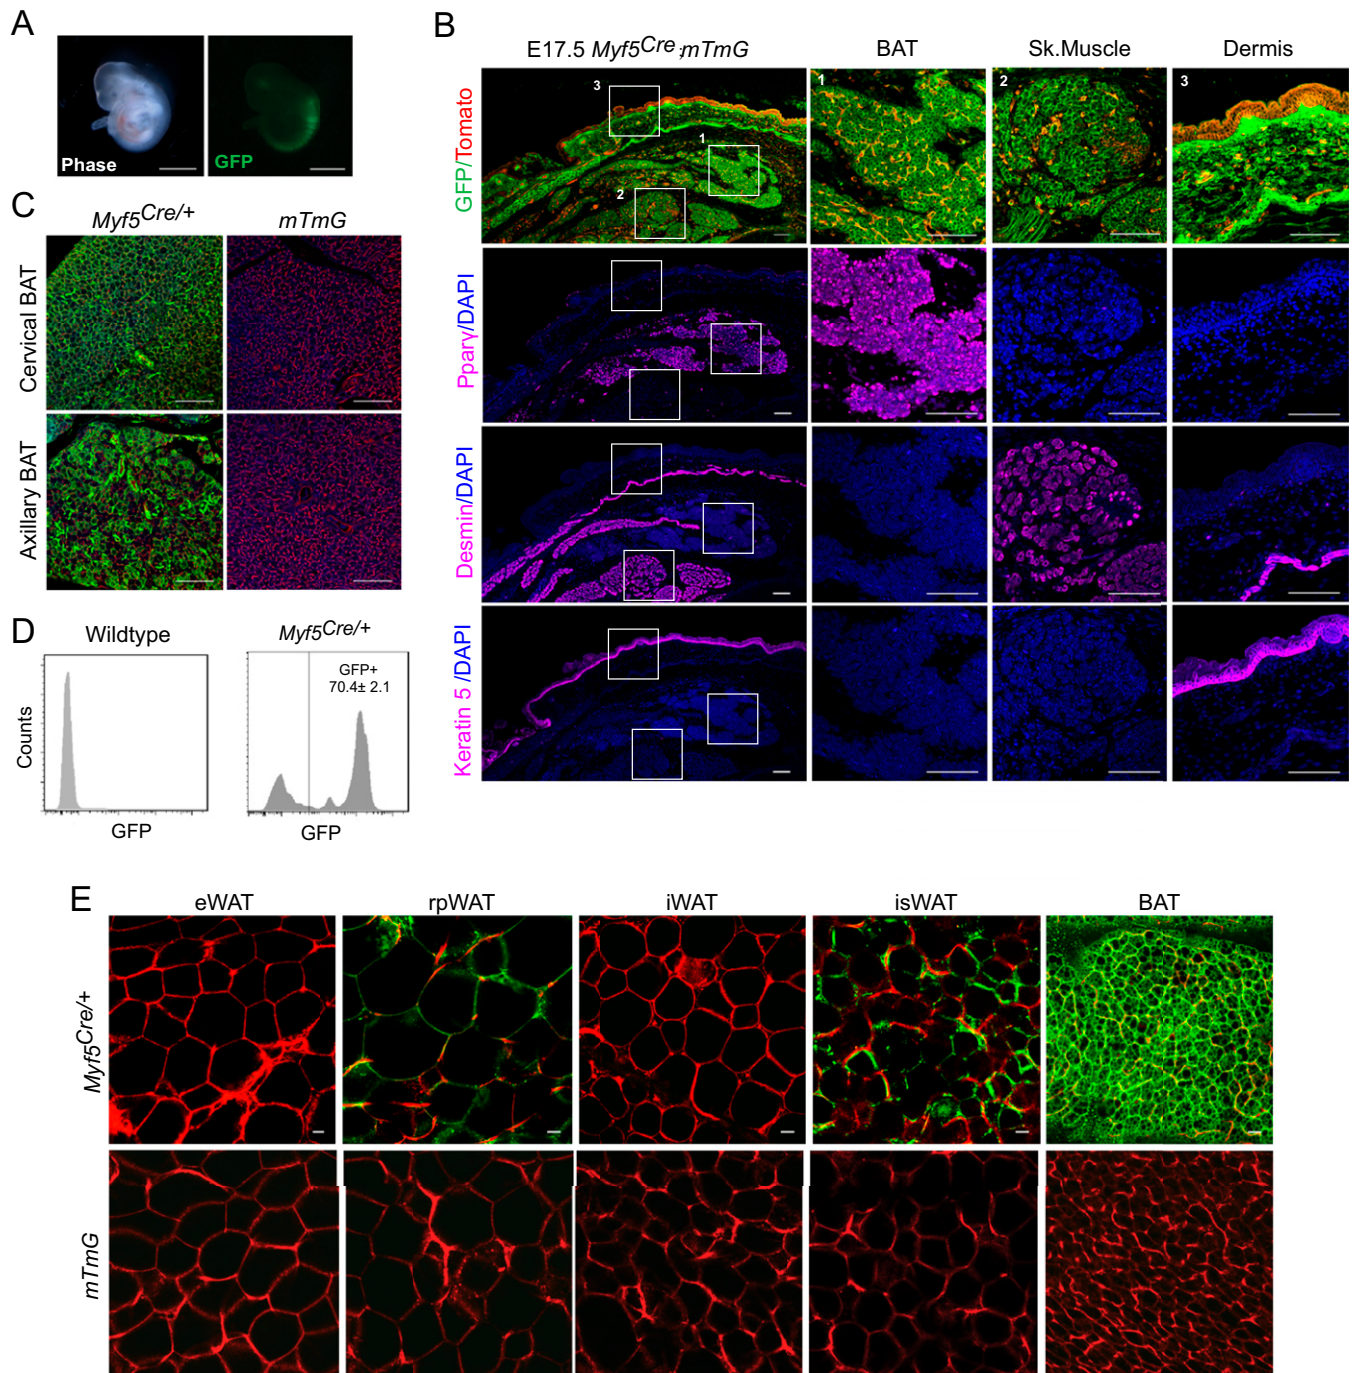

**Fig. S1.** *Myogenic factor 5 (Myf5)<sup>Cre</sup>*-expressing cells develop into brown adipose tissue (BAT) and skeletal muscle and dorsal dermis. (A) Embryonic day 9.5 (E9.5) *Myf5<sup>Cre</sup>; mTmG* embryos. (Left) Phase contrast. (Right) GFP fluorescence. (Scale bar, 1 mm.) (B) Immunofluorescence staining of GFP/Tomato, peroxisome proliferator-activated receptor  $\gamma$  (Ppar $\gamma$ ) (adipocyte), Desmin (muscle), and Keratin 5 (epidermis) in the interscapular regions of E17.5 *Myf5<sup>Cre</sup>; mTmG* embryos. Enlargements of regions 1, 2, and 3 are shown (Right). (Scale bar, 100  $\mu$ m.) (C) GFP and Tomato staining of indicated BAT depots of 4-wk-old *Myf5<sup>Cre</sup>; mTmG* mice. (Scale bar, 100  $\mu$ m.) (D) Flow cytometry analysis of precursor cells (stromal-vascular fraction) from BAT of *Myf5<sup>Cre</sup>; mTmG* mice. Value represents the percent of GFP<sup>+</sup> cells.  $n = 3$  experiments. (E) Direct fluorescence analysis of GFP and Tomato expression in several white adipose tissue (WAT) depots (eWAT, epididymal WAT; iWAT, inguinal WAT; isWAT, interscapular WAT; rtWAT, retroperitoneal WAT) and interscapular BAT of *Myf5<sup>Cre</sup>; mTmG* mice. (Scale bar, 20  $\mu$ m.)

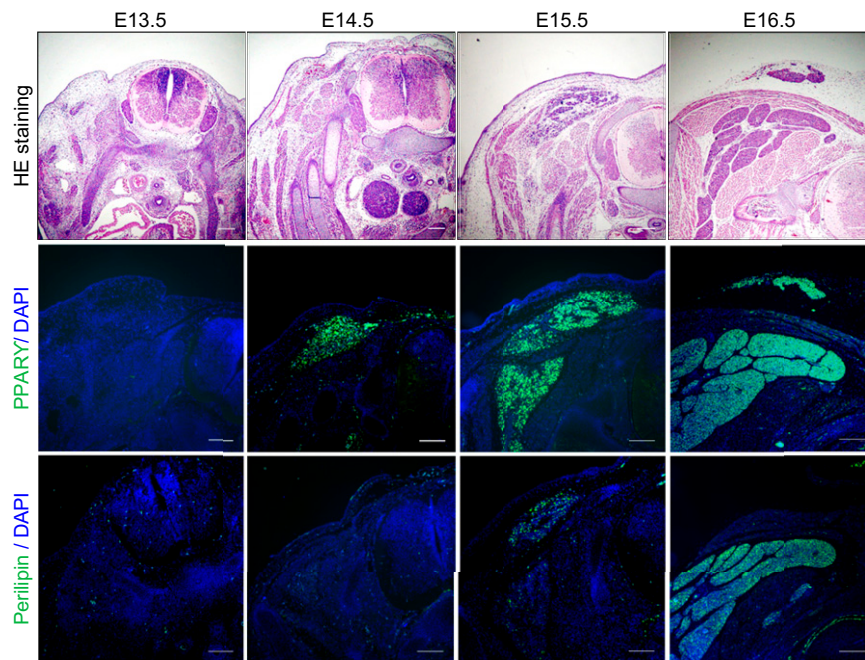

**Fig. S2.** Brown adipose tissue formation during mouse embryogenesis. H&E staining and immunofluorescence staining of Ppar $\gamma$  and perilipin on serial sections from E13.5 to E16.5 embryos. (Scale bar, 100  $\mu$ m.)

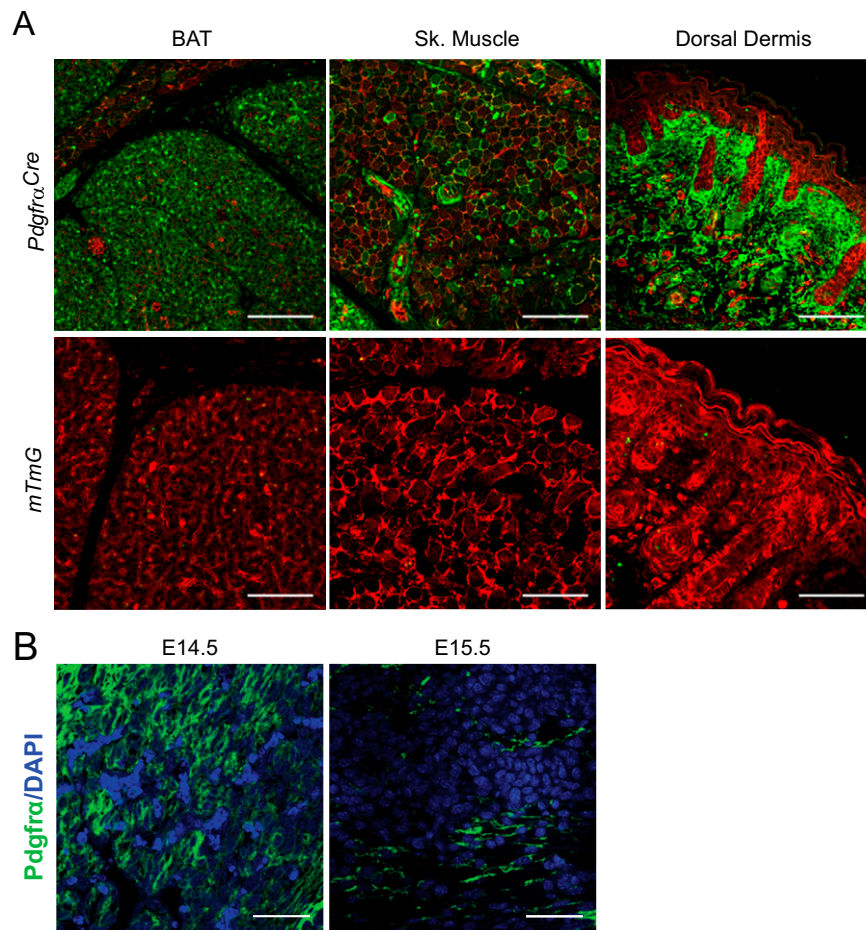

**Fig. 53.** Platelet-derived growth factor  $\alpha$  (*Pdgfra*)-expressing cells give rise to brown adipocytes, skeletal muscle, and dorsal dermis. (A) Immunofluorescence staining of GFP (green)/Tomato (red) in BAT, skeletal muscle (Sk. muscle), and dorsal dermis of *Pdgfra<sup>Cre</sup>; mTmG* mice. (Scale bar, 100  $\mu$ m.) (B) Immunofluorescence staining for *Pdgfra* (green) in BAT regions of E14.5 and E15.5 embryos. (Scale bar, 50  $\mu$ m.)

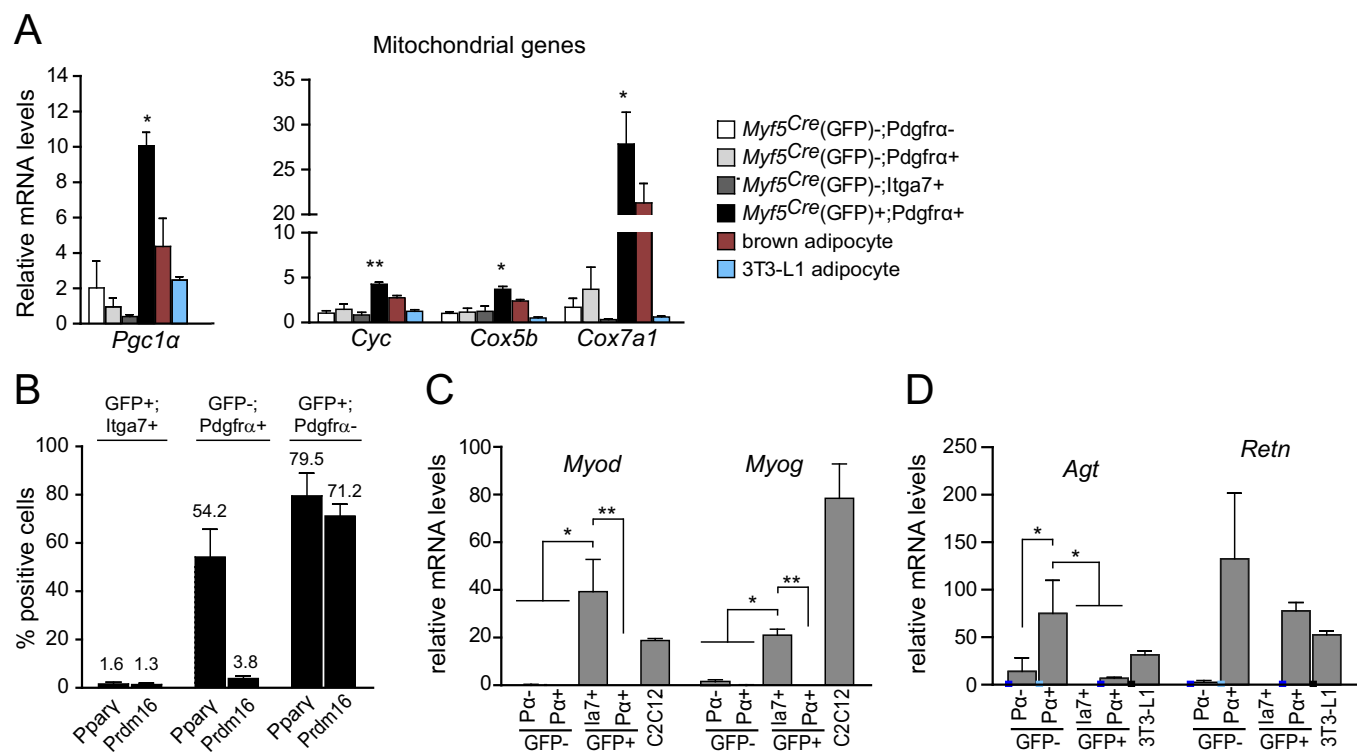

**Fig. S4.** Brown adipogenic potential of embryonic *Myf5<sup>Cre</sup>* (GFP)<sup>+</sup>; Pdgfra<sup>+</sup> cells. (A) mRNA expression levels of *Pgc1α* and mitochondrial genes in differentiated cultures of FACS-purified cells from E14.5 *Myf5<sup>Cre</sup>*; *mTmG* embryos or cell lines (as indicated). (B) Percentage of Ppar<sup>+</sup> and PR domain containing 16 (Prdm16)<sup>+</sup> cells in indicated cell cultures based on immunofluorescence analysis. *n* = >45 fields from three experiments. (C and D) mRNA levels of muscle (C) and white fat (D) selective markers in differentiated cultures of sorted cells (as indicated). [Scale bar, 100 μm (B) and 20 μm (D).]

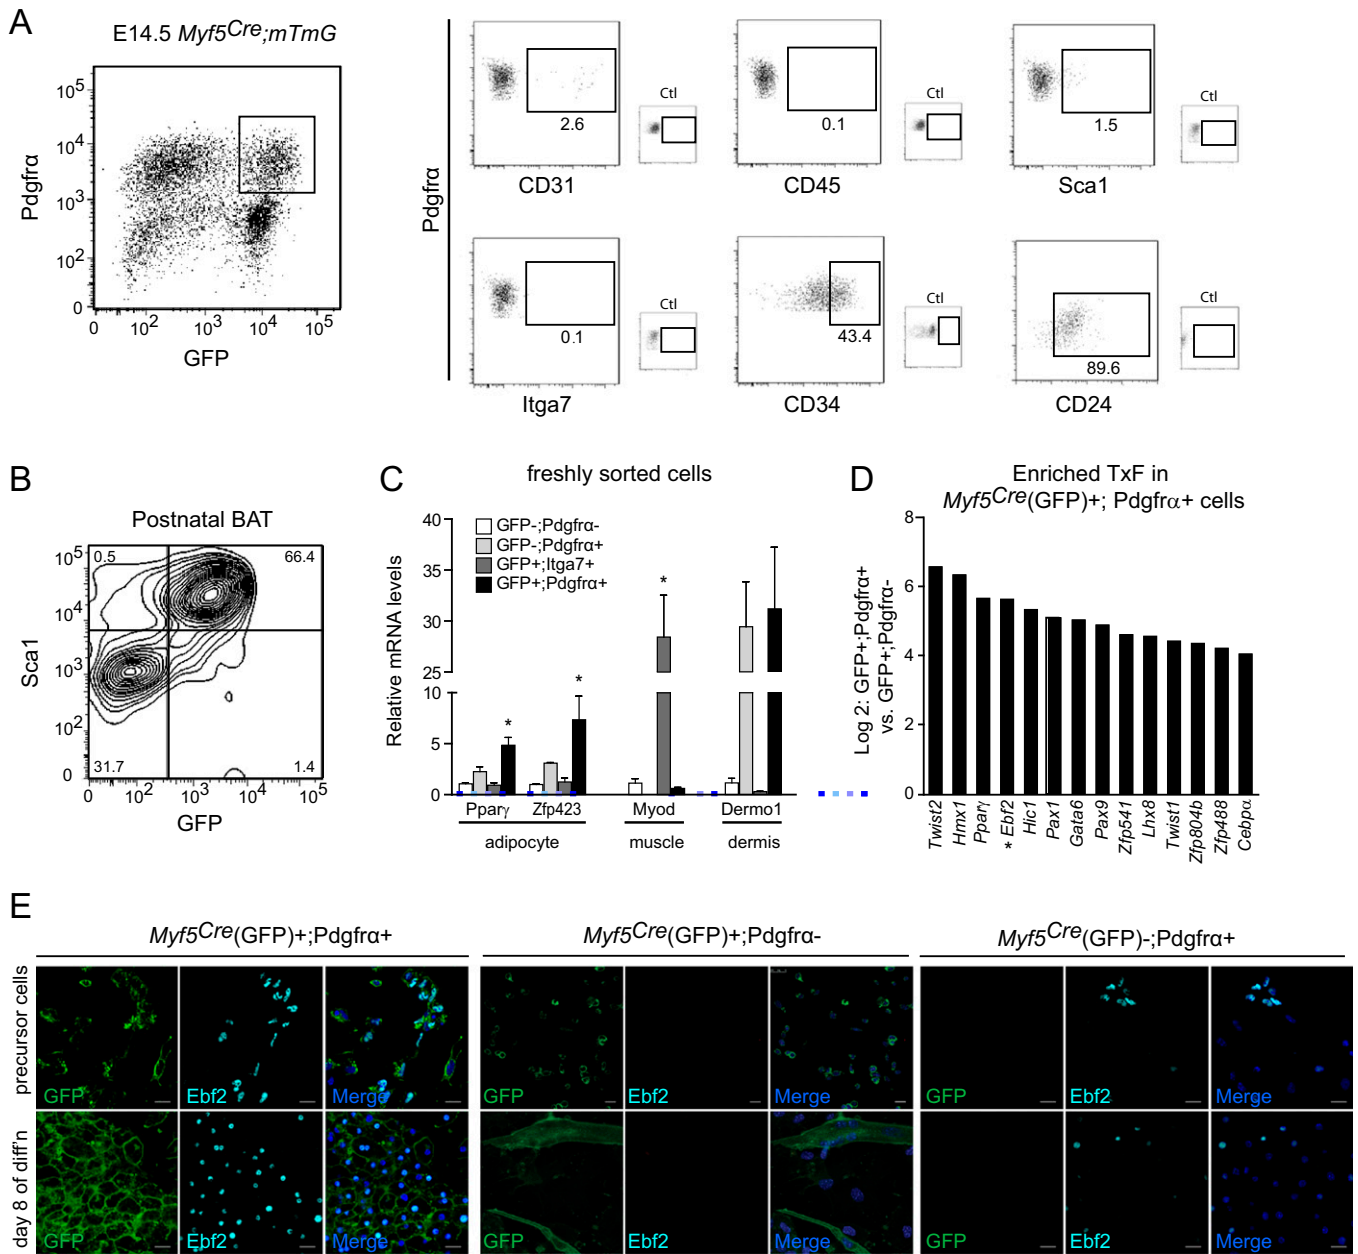

**Fig. S5.** Molecular analysis of *Myf5<sup>Cre</sup> (GFP)<sup>+</sup>; Pdgfra<sup>+</sup>* precursor cells. (A) *Myf5<sup>Cre</sup> (GFP)<sup>+</sup>; Pdgfra<sup>+</sup>* cells were analyzed for their expression of indicated cell surface antigens by flow cytometry. Gates were set based on isotype control staining (Right). (B) Flow cytometry analysis of Sca1 expression in stromal vascular cells from adult BAT. (C) mRNA levels of adipose, muscle and dermis lineage markers in freshly sorted cell fractions (as indicated). Values are mean  $\pm$  SD,  $n = 3$  experiments;  $*P < 0.05$ . (D) Transcriptional factors (TxF) with enriched expression levels ( $>16$ -fold) in *Myf5<sup>Cre</sup> (GFP)<sup>+</sup>; Pdgfra<sup>+</sup>* cells relative to *Myf5<sup>Cre</sup> (GFP)<sup>+</sup>; Pdgfra<sup>-</sup>* cells. (E) Immunofluorescence analysis of early B cell factor 2 (Ebf2) (cyan) expression in indicated cell fractions before (precursor cells) and after inducing adipocyte differentiation (day 8). (Scale bar, 20  $\mu$ m.)

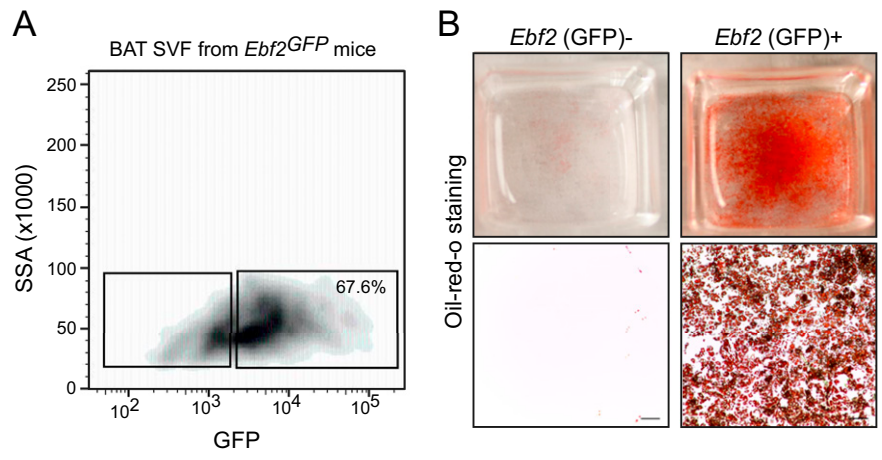

**Fig. 56.** *Ebf2*<sup>+</sup> cells in the stromal vascular fraction of BAT are brown adipogenic precursors. (A) Flow cytometry analysis of *Ebf2* (GFP) expression in stromal vascular fraction (SVF) isolated from BAT of *Ebf2<sup>GFP</sup>* mice. Positive and negative gates were set by analyzing cells from wild-type BAT. Value is the percentage of GFP<sup>+</sup> cells. (B) Sorted cells were induced to undergo adipocyte differentiation followed by Oil Red O staining of lipid droplets. (Scale bar, 100  $\mu$ m.)

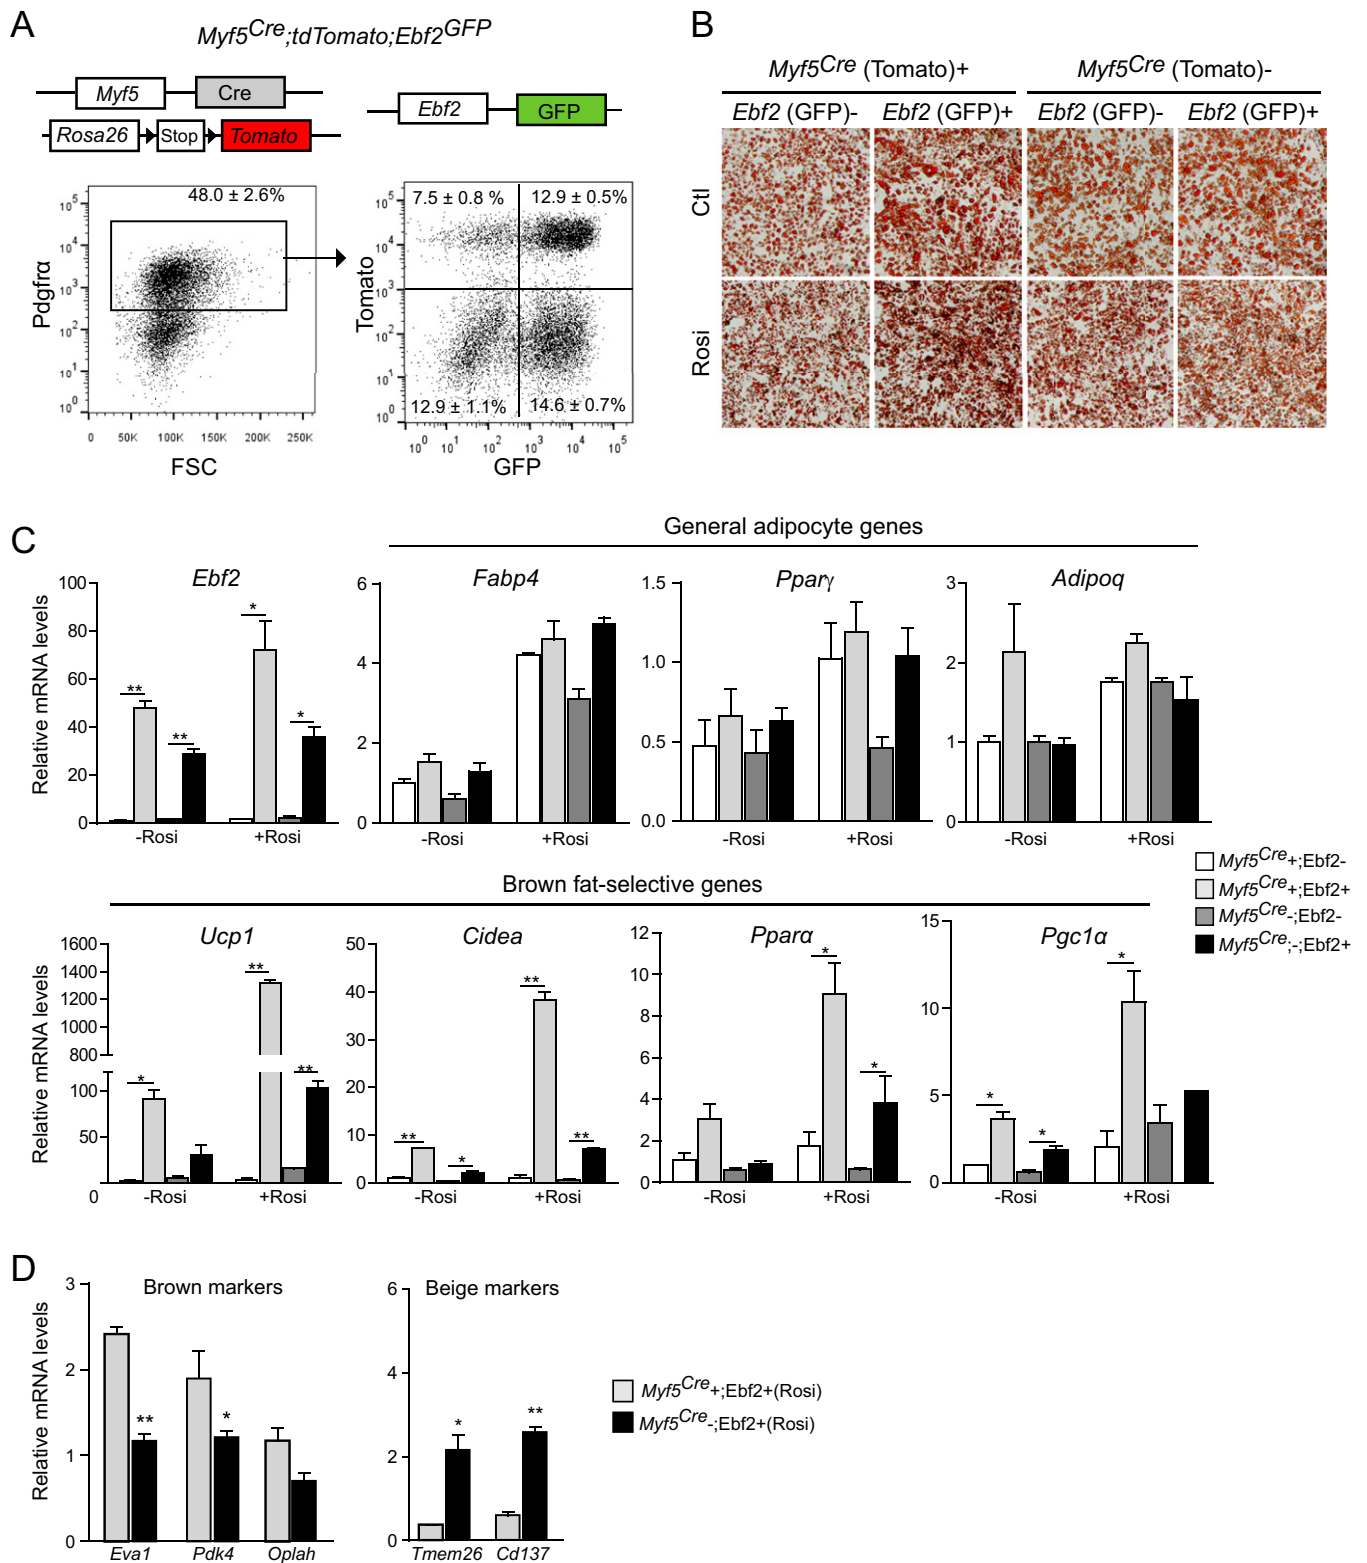

**Fig. S7. *Ebf2*-expression marks precursor cells with brown and beige adipogenic potential.** (A) Fibroblasts from E14.5 *Myf5<sup>Cre</sup>; tdTomato; Ebf2<sup>GFP</sup>* embryos were fractionated based on their expression of GFP, Pdgfra, and tdTomato. The percentage of each cell fraction is reported as mean  $\pm$  SD,  $n = 3$  experiments. (B) Oil Red O staining of indicated cell cultures after adipocyte differentiation in the presence or absence of 0.5 mM rosiglitazone (Rosi). (C) mRNA levels of *Ebf2*, general adipogenic genes and brown-fat-selective genes in cultures from B. (D) mRNA levels of brown (Left) and beige (Right) fat markers in indicated cell cultures. Expression values are mean  $\pm$  SD,  $n = 3$  experiments; \* $P < 0.05$ , \*\* $P < 0.01$ .

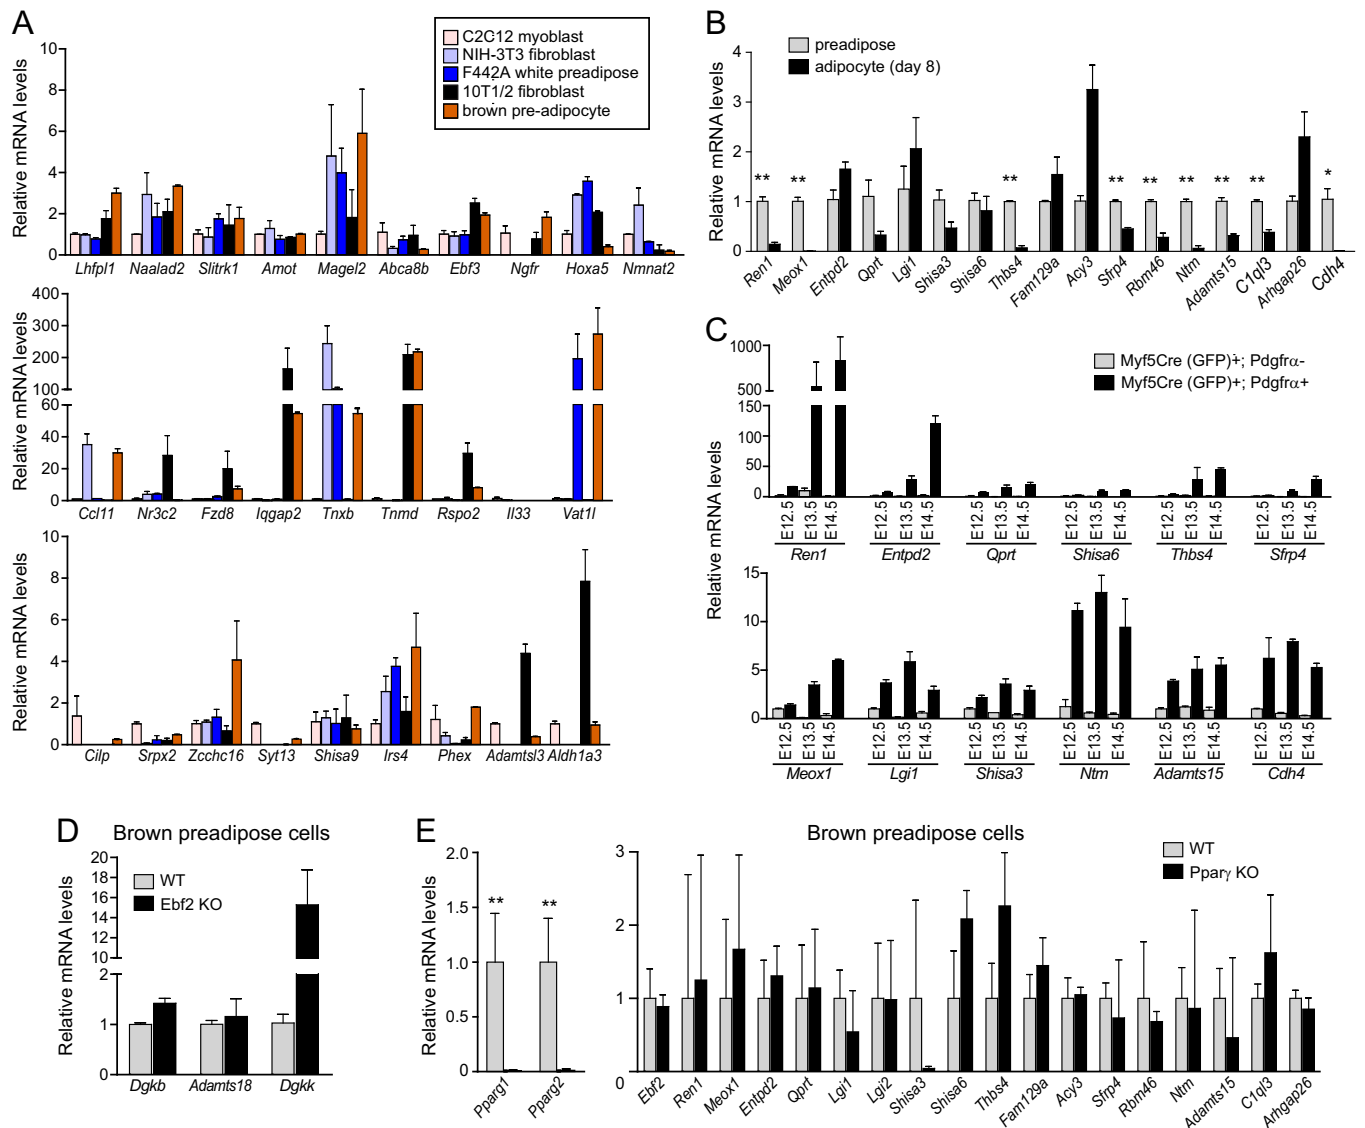

**Fig. 58.** Ebf2 regulates the gene expression profile of brown preadipose cells. (A) mRNA levels of brown preadipose signature genes in cell lines (as indicated). (B) mRNA levels of signature genes before and after adipocyte differentiation in an immortalized brown fat cell line. (C) mRNA levels of signature genes in sorted *Myf5<sup>Cre</sup>* (GFP)<sup>+</sup>; Pdfgr $\alpha$ <sup>-</sup> and *Myf5<sup>Cre</sup>* (GFP)<sup>+</sup>; Pdfgr $\alpha$ <sup>+</sup> cells from the dorsal region of mouse embryos at different stages. (D) mRNA levels of *Dgkb*, *Adamts18*, and *Dgkk* in wild-type (WT) and Ebf2 knockout (KO) brown preadipose cells. (E) mRNA levels of signature genes in WT and Pparg KO brown preadipose cells. All expression data are mean  $\pm$  SD,  $n = 3-7$ ; \* $P < 0.05$ , \*\* $P < 0.01$ .
